# Supplementary material for: Using intracellular markers to identify a novel set of surface markers for live cell purification from a heterogeneous hIPSC culture
Source: PubMed Central journal article supplement (PMC5770419; doi:10.1038/s41598-018-19291-4), 2018-01-16
Supplement: 41598_2018_19291_MOESM1_ESM.pdf [file 41598_2018_19291_MOESM1_ESM.pdf]

Supplementary Information

**Using intracellular markers to identify a novel set of surface markers for live cell purification from a heterogeneous hPSC culture**

Elizabeth J. Paik\*, Alison O'Neil\*, Shi-Yan Ng\*, Chicheng Sun, Lee L. Rubin<sup>#</sup>

Department of Stem Cell and Regenerative Biology, Harvard University, Cambridge, MA 02138  
Harvard Stem Cell Institute, Cambridge, MA 02138

\*Co-first authors

<sup>#</sup>Correspondence:

Lee L. Rubin

lee\_rubin@harvard.edu

**Supplementary Table S1:** Full list of the differentially expressed genes from comparing LMX1<sup>+</sup>/FOXA2<sup>+</sup> to LMX1<sup>-</sup>/FOXA2<sup>-</sup> neural progenitor cells. The microarray was done on an Affymetrix Human ST 2.0 Array.

| <b>Gene Symbol</b> | <b>Fold Change</b> | <b>Affymetrix Transcript Cluster ID</b> |
|--------------------|--------------------|-----------------------------------------|
| LINC00261          | 49.72              | 16917810                                |
| SPON1              | 17.93              | 16722278                                |
| CMTM8              | 16.23              | 16938647                                |
| SERPINF1           | 12.92              | 16829570                                |
| SLIT2              | 12.83              | 16965377                                |
| NTN1               | 12.56              | 16831013                                |
| HEG1               | 9.19               | 16958403                                |
| OR51F2             | 9.11               | 16721212                                |
| MYOF               | 8.93               | 16716590                                |
| CORIN              | 8.24               | 16975671                                |
| SLC7A11            | 8.12               | 16979917                                |
| TTC6               | 7.81               | 16783537                                |
| ADAMTS12           | 7.46               | 16995047                                |
| FREM2              | 7.34               | 16774130                                |
| EFEMP1             | 7.19               | 16897834                                |
| SERPINI1           | 7.07               | 16947715                                |
| FOXA1              | 6.27               | 16792181                                |
| TMEM65             | 6.25               | 17080853                                |
| SALL1              | 6.24               | 16826460                                |
| TSPAN2             | 5.73               | 16691314                                |
| PLCL1              | 5.64               | 16889160                                |
| STOX1              | 5.59               | 16705439                                |
| COLEC12            | 5.57               | 16853399                                |
| SHH                | 5.55               | 17064810                                |
| CRISPLD1           | 5.52               | 17070120                                |
| GALR1              | 5.38               | 16853210                                |
| SULF2              | 5.24               | 16919962                                |
| ALCAM              | 5.17               | 16943548                                |
| PRPS1              | 5.15               | 17106031                                |
| FREM1              | 5.09               | 17092531                                |
| TXLNB              | 5.07               | 17024265                                |
| RYR2               | 5.03               | 16679142                                |
| WNT5A              | 5.02               | 16955197                                |
| CMTM7              | 4.79               | 16938656                                |
| RAI14              | 4.71               | 16983848                                |
| PLEKHA5            | 4.66               | 16748888                                |

|                |      |          |
|----------------|------|----------|
| <b>PLXDC2</b>  | 4.5  | 16703036 |
| <b>CCND2</b>   | 4.45 | 16746992 |
| <b>TTR</b>     | 4.38 | 16851786 |
| <b>NID1</b>    | 4.21 | 16700888 |
| <b>DOCK10</b>  | 4.18 | 16909081 |
| <b>IQGAP2</b>  | 4.17 | 16986351 |
| <b>ADAMTS9</b> | 4.14 | 16955822 |
| <b>GJA1</b>    | 4.14 | 17012148 |
| <b>RAB3B</b>   | 4.03 | 16687123 |
| <b>CFC1</b>    | 4    | 16902847 |
| <b>SEMA3E</b>  | 3.98 | 17059292 |
| <b>ARMC3</b>   | 3.95 | 16703182 |
| <b>PTCH1</b>   | 3.9  | 17096091 |
| <b>TRAM2</b>   | 3.82 | 17020044 |
| <b>EFNA5</b>   | 3.77 | 16998682 |
| <b>TUBB4A</b>  | 3.74 | 16867756 |
| <b>HTR2C</b>   | 3.69 | 17106314 |
| <b>TCF7L2</b>  | 3.64 | 16709333 |
| <b>SLC2A13</b> | 3.62 | 16763195 |
| <b>FBN1</b>    | 3.58 | 16808793 |
| <b>BCAM</b>    | 3.55 | 16863074 |
| <b>LRP2</b>    | 3.53 | 16904827 |
| <b>PDGFD</b>   | 3.52 | 16743816 |
| <b>SLIT3</b>   | 3.52 | 17002612 |
| <b>FJX1</b>    | 3.43 | 16723662 |
| <b>SYTL5</b>   | 3.41 | 17102566 |
| <b>CADPS</b>   | 3.4  | 16955699 |
| <b>GRIN2A</b>  | 3.37 | 16823799 |
| <b>QKI</b>     | 3.37 | 17014562 |
| <b>SSFA2</b>   | 3.35 | 16888317 |
| <b>HHIP</b>    | 3.35 | 16971102 |
| <b>SHC3</b>    | 3.32 | 17095566 |
| <b>WLS</b>     | 3.31 | 16688339 |
| <b>TSPAN6</b>  | 3.31 | 17112607 |
| <b>GPR98</b>   | 3.3  | 16987140 |
| <b>DSP</b>     | 3.3  | 17004612 |
| <b>IGFBP5</b>  | 3.29 | 16908197 |
| <b>CTGF</b>    | 3.23 | 17023646 |
| <b>HECW2</b>   | 3.22 | 16906749 |
| <b>RGS9</b>    | 3.2  | 16837101 |
| <b>SLC44A1</b> | 3.13 | 17087790 |

|                   |      |          |
|-------------------|------|----------|
| <b>PPP1R14C</b>   | 3.09 | 17013664 |
| <b>FAT3</b>       | 3.07 | 16729986 |
| <b>USP2</b>       | 3.06 | 16745343 |
| <b>OTX2</b>       | 3.05 | 16793329 |
| <b>PDZRN3</b>     | 3.04 | 16956285 |
| <b>CALU</b>       | 3.04 | 17051236 |
| <b>RAB11FIP4</b>  | 3.03 | 16833000 |
| <b>RALGPS2</b>    | 3.01 | 16674292 |
| <b>LRIG3</b>      | 2.98 | 16766822 |
| <b>SEPT3</b>      | 2.98 | 16930811 |
| <b>DTNA</b>       | 2.93 | 16851866 |
| <b>FAM198B</b>    | 2.93 | 16980974 |
| <b>TMTC2</b>      | 2.92 | 16754808 |
| <b>NPC2</b>       | 2.91 | 16794705 |
| <b>PAPSS2</b>     | 2.9  | 16707009 |
| <b>LOC151657</b>  | 2.9  | 16957089 |
| <b>C17orf58</b>   | 2.89 | 16848062 |
| <b>ATXN1</b>      | 2.88 | 17015862 |
| <b>MMP2</b>       | 2.84 | 16819064 |
| <b>SERINC5</b>    | 2.84 | 16997615 |
| <b>RFX4</b>       | 2.82 | 16756370 |
| <b>LIX1</b>       | 2.82 | 16998411 |
| <b>CD47</b>       | 2.81 | 16957095 |
| <b>RNF220</b>     | 2.79 | 16663899 |
| <b>PTPRM</b>      | 2.75 | 16850759 |
| <b>LRRN2</b>      | 2.74 | 16698407 |
| <b>TSPAN7</b>     | 2.73 | 17102607 |
| <b>ACAA2</b>      | 2.71 | 16855184 |
| <b>LDB2</b>       | 2.7  | 16974626 |
| <b>ST6GALNAC3</b> | 2.69 | 16666326 |
| <b>CADPS2</b>     | 2.69 | 17062321 |
| <b>CAPN6</b>      | 2.66 | 17113362 |
| <b>EEF1G</b>      | 2.65 | 17063066 |
| <b>ATP10D</b>     | 2.58 | 16966514 |
| <b>GPC3</b>       | 2.58 | 17114288 |
| <b>DGKB</b>       | 2.57 | 17055390 |
| <b>SLIT1</b>      | 2.56 | 16717032 |
| <b>CPAMD8</b>     | 2.55 | 16870087 |
| <b>TMEM63A</b>    | 2.53 | 16699932 |
| <b>CMTM6</b>      | 2.53 | 16951917 |
| <b>TEX15</b>      | 2.53 | 17076103 |

|                 |      |          |
|-----------------|------|----------|
| <b>PXDC1</b>    | 2.51 | 17015207 |
| <b>BICC1</b>    | 2.49 | 16705089 |
| <b>ITPR1</b>    | 2.49 | 16936947 |
| <b>PPIL6</b>    | 2.49 | 17022406 |
| <b>ECE1</b>     | 2.48 | 16682989 |
| <b>ATP6AP2</b>  | 2.47 | 17102668 |
| <b>GSR</b>      | 2.46 | 17076063 |
| <b>C1QBP</b>    | 2.45 | 16840284 |
| <b>PON2</b>     | 2.45 | 17059932 |
| <b>CETN2</b>    | 2.45 | 17115077 |
| <b>ERMP1</b>    | 2.44 | 17092208 |
| <b>GALNT2</b>   | 2.43 | 16678579 |
| <b>PLTP</b>     | 2.43 | 16919703 |
| <b>ULBP3</b>    | 2.43 | 17024710 |
| <b>GDE1</b>     | 2.42 | 16824555 |
| <b>CPD</b>      | 2.42 | 16832768 |
| <b>CACNG7</b>   | 2.42 | 16865153 |
| <b>DNAH7</b>    | 2.41 | 16906656 |
| <b>AJUBA</b>    | 2.4  | 16790614 |
| <b>KLF3</b>     | 2.39 | 16966008 |
| <b>PSAP</b>     | 2.38 | 16715241 |
| <b>ZC3HAV1</b>  | 2.38 | 17063428 |
| <b>CPNE2</b>    | 2.36 | 16819430 |
| <b>TANC2</b>    | 2.36 | 16836868 |
| <b>UGDH</b>     | 2.36 | 16975310 |
| <b>PTGFRN</b>   | 2.35 | 16669180 |
| <b>KCNMA1</b>   | 2.35 | 16715793 |
| <b>RFX2</b>     | 2.35 | 16867613 |
| <b>HEPH</b>     | 2.35 | 17104283 |
| <b>ACSS3</b>    | 2.34 | 16754729 |
| <b>SPTSSB</b>   | 2.34 | 16961056 |
| <b>NME5</b>     | 2.34 | 17000342 |
| <b>CCDC47</b>   | 2.33 | 16847605 |
| <b>HIPK2</b>    | 2.33 | 17063461 |
| <b>LRRC6</b>    | 2.33 | 17081323 |
| <b>HTRA1</b>    | 2.32 | 16710126 |
| <b>GAA</b>      | 2.32 | 16838509 |
| <b>ZFP36L2</b>  | 2.32 | 16897026 |
| <b>ITGB8</b>    | 2.32 | 17043982 |
| <b>PPP4C</b>    | 2.31 | 16817811 |
| <b>KIAA1407</b> | 2.31 | 16957583 |

---

|                 |      |          |
|-----------------|------|----------|
| <b>LPHN3</b>    | 2.31 | 16967202 |
| <b>SDC2</b>     | 2.31 | 17071144 |
| <b>MLEC</b>     | 2.3  | 16757969 |
| <b>FZD2</b>     | 2.28 | 16834785 |
| <b>NUP210</b>   | 2.28 | 16950932 |
| <b>MIR218-1</b> | 2.28 | 16965432 |
| <b>PTN</b>      | 2.28 | 17063254 |
| <b>NFE2L1</b>   | 2.27 | 16835374 |
| <b>GALNT1</b>   | 2.27 | 16851933 |
| <b>SEPT10</b>   | 2.27 | 16901593 |
| <b>LAPTM4B</b>  | 2.27 | 17071208 |
| <b>GANAB</b>    | 2.26 | 16739396 |
| <b>MORN2</b>    | 2.26 | 16879276 |
| <b>DDOST</b>    | 2.25 | 16682842 |
| <b>MANBA</b>    | 2.25 | 16978444 |
| <b>CELSR1</b>   | 2.24 | 16936097 |
| <b>GRSF1</b>    | 2.24 | 16976655 |
| <b>SPAG6</b>    | 2.23 | 16703150 |
| <b>SULF1</b>    | 2.23 | 17069816 |
| <b>WDR96</b>    | 2.22 | 16718184 |
| <b>RPA1</b>     | 2.21 | 16829580 |
| <b>SORT1</b>    | 2.19 | 16690566 |
| <b>CD63</b>     | 2.19 | 16765744 |
| <b>HSDL1</b>    | 2.18 | 16828762 |
| <b>ADAMTS16</b> | 2.18 | 16982870 |
| <b>STON2</b>    | 2.17 | 16795368 |
| <b>PCTP</b>     | 2.17 | 16836277 |
| <b>VGLL3</b>    | 2.17 | 16956532 |
| <b>CAP2</b>     | 2.17 | 17005138 |
| <b>SPARC</b>    | 2.15 | 17001927 |
| <b>NCAN</b>     | 2.14 | 16859969 |
| <b>DAB2</b>     | 2.14 | 16995645 |
| <b>ARRDC4</b>   | 2.13 | 16805474 |
| <b>MOB1B</b>    | 2.13 | 16967602 |
| <b>PTPN13</b>   | 2.13 | 16968529 |
| <b>FAT1</b>     | 2.13 | 16982269 |
| <b>TTC18</b>    | 2.12 | 16715434 |
| <b>DNAAF1</b>   | 2.12 | 16821437 |
| <b>RNF157</b>   | 2.12 | 16849148 |
| <b>CDH11</b>    | 2.1  | 16827041 |
| <b>CACNG4</b>   | 2.1  | 16837172 |

---

|                    |       |          |
|--------------------|-------|----------|
| <b>C20orf3</b>     | 2.1   | 16918011 |
| <b>TWSG1</b>       | 2.09  | 16850896 |
| <b>RAD23B</b>      | 2.09  | 17087933 |
| <b>NR6A1</b>       | 2.09  | 17098305 |
| <b>BCOR</b>        | 2.09  | 17110148 |
| <b>MACF1</b>       | 2.08  | 16662755 |
| <b>ALDH18A1</b>    | 2.08  | 16716846 |
| <b>PRDX3</b>       | 2.08  | 16718922 |
| <b>ARPP19</b>      | 2.08  | 16809506 |
| <b>RASGRF2</b>     | 2.08  | 16986777 |
| <b>CHRD1</b>       | 2.07  | 17113346 |
| <b>SEL1L</b>       | 2.06  | 16795394 |
| <b>HYOU1</b>       | 2.05  | 16745186 |
| <b>VASN</b>        | 2.05  | 16815509 |
| <b>MED12L</b>      | 2.05  | 16946966 |
| <b>TJP2</b>        | 2.05  | 17085685 |
| <b>ENKUR</b>       | 2.04  | 16712587 |
| <b>TM9SF3</b>      | 2.04  | 16716983 |
| <b>OPCML</b>       | 2.04  | 16746290 |
| <b>UNC119B</b>     | 2.04  | 16757979 |
| <b>CANX</b>        | 2.04  | 16993397 |
| <b>DNAH5</b>       | 2.04  | 16994434 |
| <b>PODXL</b>       | 2.04  | 17062985 |
| <b>TRAM1</b>       | 2.04  | 17078102 |
| <b>BASP1</b>       | 2.03  | 16983451 |
| <b>FRRS1L</b>      | 2.03  | 17096958 |
| <b>LOC339535</b>   | 2.02  | 16701007 |
| <b>HYDIN</b>       | 2.02  | 16827874 |
| <b>LPCAT1</b>      | 2.02  | 16994002 |
| <b>SALL2</b>       | 2.01  | 16790413 |
| <b>NPHP1</b>       | 2.01  | 16901632 |
| <b>PDGFRA</b>      | 2.01  | 16966809 |
| <b>HNRNPA1</b>     | -2.01 | 16751993 |
| <b>SLITRK1</b>     | -2.01 | 16780092 |
| <b>SNORD115-20</b> | -2.01 | 16798341 |
| <b>COL11A1</b>     | -2.02 | 16690211 |
| <b>DCX</b>         | -2.05 | 17113378 |
| <b>VAMP1</b>       | -2.07 | 16760393 |
| <b>ARL4D</b>       | -2.08 | 16834621 |
| <b>MIR4525</b>     | -2.09 | 16850286 |
| <b>CNR1</b>        | -2.1  | 17021504 |

|             |       |          |
|-------------|-------|----------|
| L1TD1       | -2.11 | 16665439 |
| H3F3B       | -2.12 | 16848888 |
| DNER        | -2.13 | 16909319 |
| NAV1        | -2.15 | 16675794 |
| DNAJB1      | -2.16 | 16869653 |
| SNORD115-44 | -2.19 | 16798432 |
| TCTA        | -2.19 | 16940693 |
| CA2         | -2.2  | 17070456 |
| HIST2H2BC   | -2.22 | 16692624 |
| RYR3        | -2.22 | 16798965 |
| PCDH15      | -2.23 | 16714433 |
| SNORD115-32 | -2.24 | 16798408 |
| DUX2        | -2.27 | 16973271 |
| GLUL        | -2.28 | 16696979 |
| MIR4294     | -2.28 | 16714084 |
| CDKN1A      | -2.28 | 17008007 |
| ERBB3       | -2.29 | 16752397 |
| IER5L       | -2.29 | 17099027 |
| ZC3H10      | -2.3  | 16752485 |
| RHOB        | -2.3  | 16877555 |
| DUX2        | -2.31 | 16973292 |
| RGS16       | -2.35 | 16697018 |
| ZIC1        | -2.35 | 16946666 |
| HIST1H3F    | -2.36 | 17016400 |
| SERTAD1     | -2.37 | 16872443 |
| ZIC5        | -2.39 | 16780632 |
| FOS         | -2.41 | 16786587 |
| HIST1H2BC   | -2.42 | 17005603 |
| EGFEM1P     | -2.44 | 16947759 |
| REXO1L2P    | -2.46 | 17070478 |
| KLF7-IT1    | -2.49 | 16907641 |
| RNU1-13P    | -2.5  | 16691877 |
| ROR1        | -2.53 | 16665588 |
| P2RX3       | -2.54 | 16724818 |
| SNAR-B1     | -2.56 | 16874508 |
| ANKRD37     | -2.58 | 16972950 |
| SNORA21     | -2.6  | 16844046 |
| NRP2        | -2.64 | 16889879 |
| NRN1        | -2.68 | 17015324 |
| REXO1L2P    | -2.68 | 17070480 |
| POU4F1      | -2.69 | 16779990 |



|                     |       |          |
|---------------------|-------|----------|
| <b>SNORD4B</b>      | -2.7  | 16832568 |
| <b>EPHA7</b>        | -2.7  | 17021792 |
| <b>RELN</b>         | -2.71 | 17061298 |
| <b>HEXIM1</b>       | -2.74 | 16834921 |
| <b>RPS27</b>        | -2.77 | 16671325 |
| <b>SNORA42</b>      | -2.79 | 16694357 |
| <b>LOC100507303</b> | -2.79 | 16823043 |
| <b>DUSP1</b>        | -2.79 | 17002846 |
| <b>LRRC7</b>        | -2.81 | 16665976 |
| <b>ZNF878</b>       | -2.89 | 16869060 |
| <b>ROBO2</b>        | -2.89 | 16942743 |
| <b>UNC5C</b>        | -2.9  | 16978054 |
| <b>MIR3189</b>      | -2.98 | 16859800 |
| <b>ELAVL2</b>       | -2.99 | 17092918 |
| <b>RNU11</b>        | -3.02 | 16661646 |
| <b>CNTN2</b>        | -3.03 | 16676405 |
| <b>SLC2A3</b>       | -3.03 | 16760868 |
| <b>EYA2</b>         | -3.05 | 16914478 |
| <b>RASL11B</b>      | -3.05 | 16966733 |
| <b>IER5</b>         | -3.06 | 16674618 |
| <b>MIR219-2</b>     | -3.08 | 17098866 |
| <b>NFASC</b>        | -3.09 | 16676355 |
| <b>SNAI1</b>        | -3.09 | 16914791 |
| <b>PRDM12</b>       | -3.13 | 17090350 |
| <b>SNORA45</b>      | -3.15 | 16721732 |
| <b>SGK1</b>         | -3.21 | 17023810 |
| <b>DDIT4</b>        | -3.24 | 16705961 |
| <b>LOC100132966</b> | -3.26 | 16691721 |
| <b>NRG1</b>         | -3.3  | 17067696 |
| <b>SNORA64</b>      | -3.31 | 16822919 |
| <b>PCDH8</b>        | -3.35 | 16779486 |
| <b>SNAR-E</b>       | -3.37 | 16873645 |
| <b>MIR425</b>       | -3.37 | 16953809 |
| <b>DPYD</b>         | -3.41 | 16689969 |
| <b>STMN2</b>        | -3.44 | 17070249 |
| <b>HIST1H2AK</b>    | -3.45 | 17016496 |
| <b>BOC</b>          | -3.56 | 16944010 |
| <b>EBF1</b>         | -3.56 | 17002278 |
| <b>RPLP1</b>        | -3.6  | 16802553 |
| <b>SNORA71B</b>     | -3.64 | 16919223 |
| <b>HIST2H4B</b>     | -3.7  | 17005790 |

|                  |       |          |
|------------------|-------|----------|
| <b>HSPA1B</b>    | -3.71 | 17030833 |
| <b>STARD5</b>    | -3.75 | 16812406 |
| <b>HIST1H2BN</b> | -3.75 | 17005871 |
| <b>SMOC1</b>     | -3.82 | 16785897 |
| <b>SNORA54</b>   | -3.83 | 16734524 |
| <b>STC1</b>      | -3.84 | 17075553 |
| <b>HSPA1B</b>    | -3.87 | 17028007 |
| <b>MIR378D2</b>  | -3.89 | 17079181 |
| <b>MEIS2</b>     | -3.93 | 16807139 |
| <b>HSPA1B</b>    | -3.94 | 17026318 |
| <b>HSPA1B</b>    | -3.94 | 17027994 |
| <b>HSPA1B</b>    | -3.94 | 17030820 |
| <b>SNHG12</b>    | -4    | 16684178 |
| <b>HIST2H2BF</b> | -4    | 16692603 |
| <b>NHLH1</b>     | -4.01 | 16672630 |
| <b>FTH1</b>      | -4.04 | 16739208 |
| <b>NABP1</b>     | -4.1  | 16888963 |
| <b>HIST2H4B</b>  | -4.15 | 16670377 |
| <b>JUN</b>       | -4.15 | 16687875 |
| <b>HIST2H4B</b>  | -4.15 | 16692626 |
| <b>HSPA1B</b>    | -4.19 | 17038297 |
| <b>EBF2</b>      | -4.21 | 17075628 |
| <b>ZIC2</b>      | -4.22 | 16776103 |
| <b>SNORA74B</b>  | -4.23 | 16992465 |
| <b>SCARNA27</b>  | -4.23 | 17015472 |
| <b>NPPC</b>      | -4.24 | 16909551 |
| <b>HSPA1B</b>    | -4.24 | 17006881 |
| <b>ADRB2</b>     | -4.31 | 16990848 |
| <b>HSPA1A</b>    | -4.41 | 17006863 |
| <b>SNORD75</b>   | -4.47 | 16696533 |
| <b>SCARNA11</b>  | -4.49 | 16760514 |
| <b>GLI3</b>      | -4.53 | 17056992 |
| <b>SST</b>       | -4.61 | 16962574 |
| <b>HSPA1B</b>    | -4.66 | 17038309 |
| <b>CXCR4</b>     | -4.68 | 16903140 |
| <b>EBF3</b>      | -4.83 | 16719562 |
| <b>METTL12</b>   | -4.85 | 16725901 |
| <b>HIST1H3J</b>  | -5.09 | 17016509 |
| <b>SNAI2</b>     | -5.1  | 17077004 |
| <b>PLK2</b>      | -5.41 | 16996433 |
| <b>REXO1L1</b>   | -6.07 | 17070482 |

|                  |        |          |
|------------------|--------|----------|
| <b>PMAIP1</b>    | -6.21  | 16852683 |
| <b>GADD45B</b>   | -6.35  | 16856803 |
| <b>PCDH9</b>     | -6.42  | 16779667 |
| <b>MIR3193</b>   | -7.35  | 16912368 |
| <b>HIST1H3A</b>  | -8.06  | 17005532 |
| <b>HIST1H2BD</b> | -9.23  | 17005573 |
| <b>LOC145845</b> | -9.38  | 16807125 |
| <b>TFAP2B</b>    | -9.67  | 17009545 |
| <b>ID1</b>       | -9.68  | 16912362 |
| <b>ROCK1P1</b>   | -10.33 | 16850428 |
| <b>MIR3143</b>   | -11.2  | 17005797 |
| <b>HIST2H4B</b>  | -11.79 | 17005586 |
| <b>HIST1H2AH</b> | -12.6  | 17005787 |
| <b>HIST1H2BG</b> | -13.95 | 17016390 |
| <b>HIST1H3H</b>  | -14.12 | 17005862 |
| <b>PAX3</b>      | -17.44 | 16908928 |
| <b>HIST2H3D</b>  | -21.24 | 16692614 |

## Dopaminergic Neuron Markers

| Gene  | fold change |
|-------|-------------|
| FOXA2 | 4.99        |
| FOXA1 | 6.27        |
| LMX1A | 1.97        |
| LMX1B | 1.34        |
| OTX2  | 3.05        |
| WNT5A | 5.02        |
| SHH   | 5.55        |
| PTCH1 | 3.9         |

## Putative Cell Surface Markers

| Gene         | fold change |
|--------------|-------------|
| CORIN        | +8.24       |
| CD166        | +5.17       |
| CD239 (BCAM) | +3.55       |
| CD47         | +2.81       |
| SORT1        | +2.19       |
| CD63         | +2.19       |
| CNR1         | -2.1        |
| EPHA7        | -2.7        |
| PCDH8        | -3.35       |
| ADRB2        | -4.31       |
| CXCR4        | -4.68       |
| PCDH9        | -6.42       |

**Supplementary Table S2.** Microarray analysis confirmed the fixed, sorted population was of the dopaminergic lineage by revealing upregulation of characteristic genes. Additionally, through the use of GO annotation, the microarray yielded a putative list of positive and negative surface markers for live cell purification.

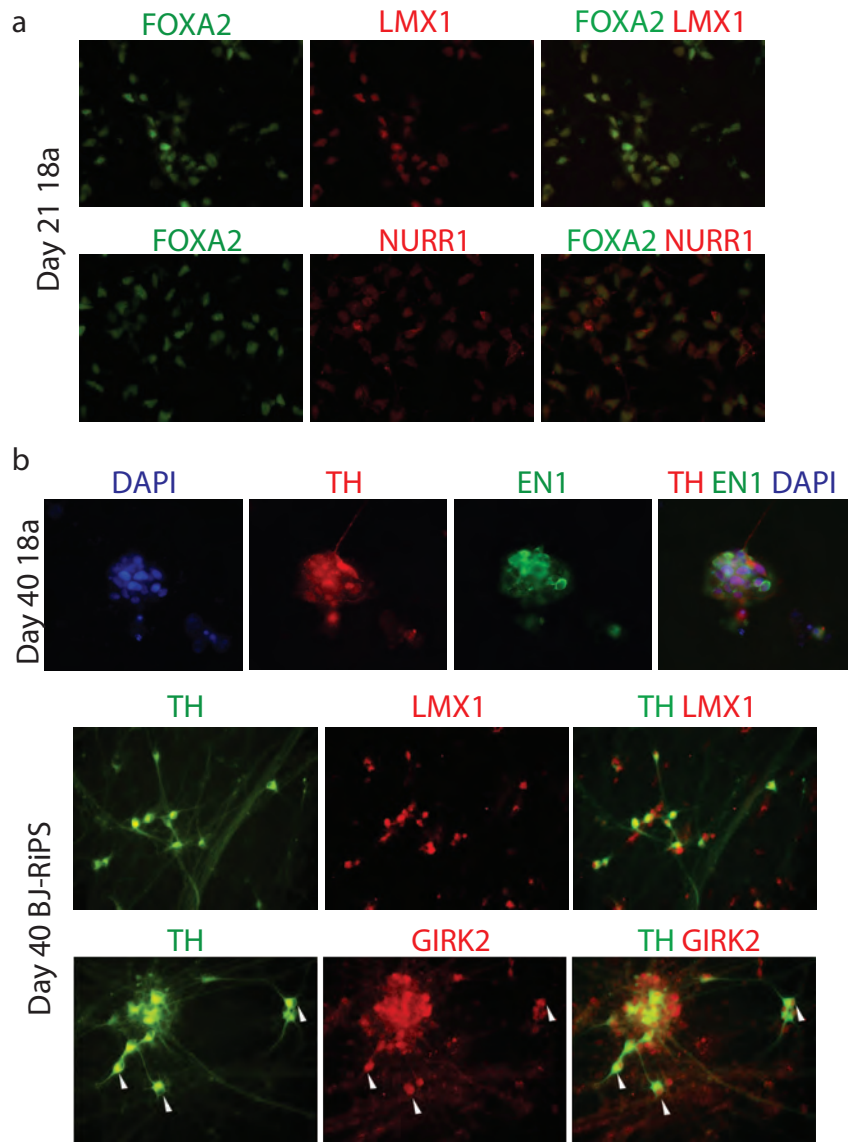

**Figure S1. Additional immunostaining characterizing the iPS derived DA neurons.** a. Differentiation day 21 18a cells show co-expression of LMX1/FOXA2 and FOXA2/NURR1. b. Differentiation day 40 18a cells show co-expression of TH and EN1 while day 40 BJ-RiPS show co-expression TH/LMX1 and TH/GIRK2.

a

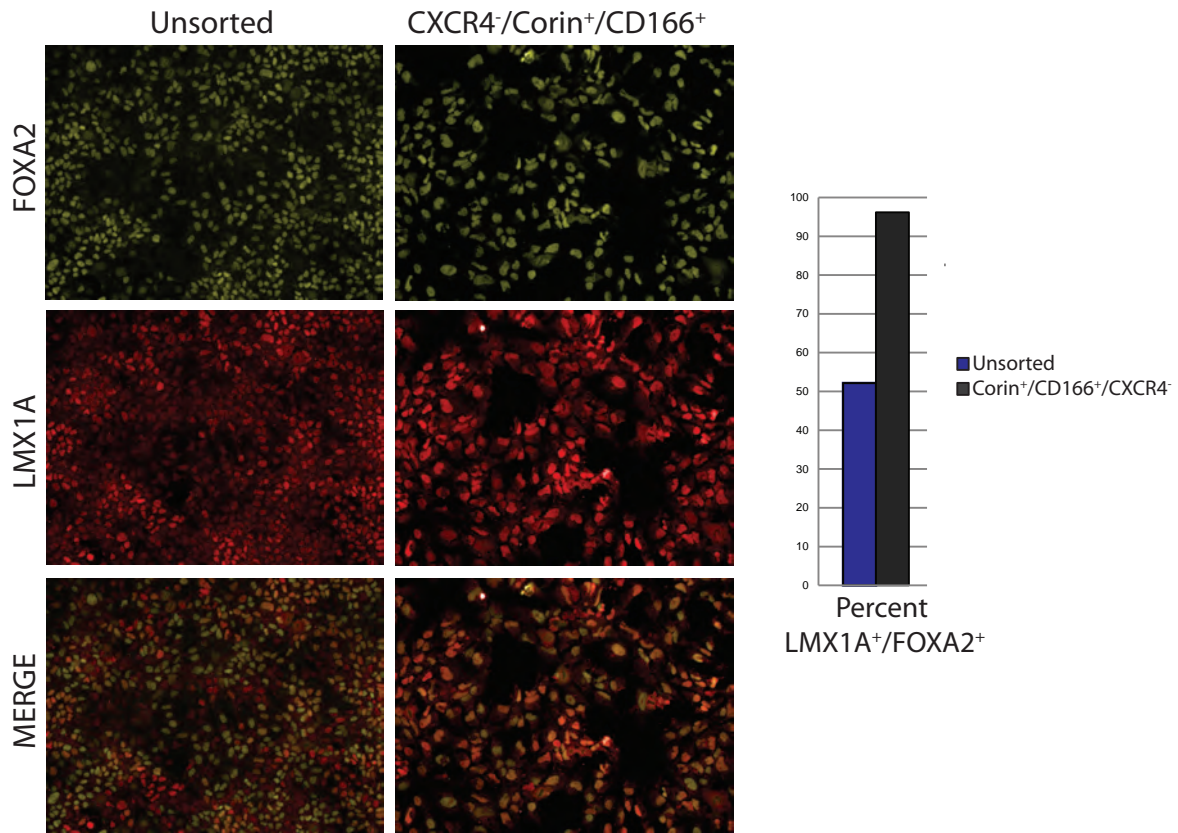

b

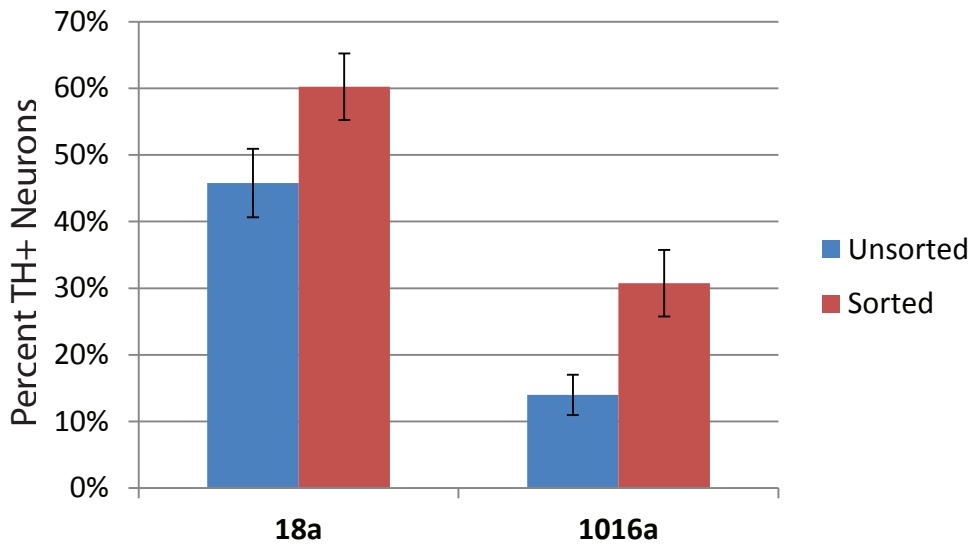

**Figure S2. CXCR4<sup>-</sup>/CORIN<sup>+</sup>/CD166<sup>+</sup> FACS sorting enriches for the FOXA2/LMX1A double positive population and increases the differentiation efficiency to TH<sup>+</sup> neurons.** a. Day 14 BJ riPS dopaminergic progenitors were live FACS sorted for CXCR4<sup>-</sup>/CORIN<sup>+</sup>/CD166<sup>+</sup> and replated for 48 hours. They were then fixed and stained for FOXA2 and LMX1A. After sorting, the FOXA2<sup>+</sup>/LMX1A<sup>+</sup> population is highly enriched (n=1). b. The 18a and 1016a cell lines both show increased percentages of TH<sup>+</sup> neurons after being sorted as progenitors. n=2, error bars represent 1 standard deviation.

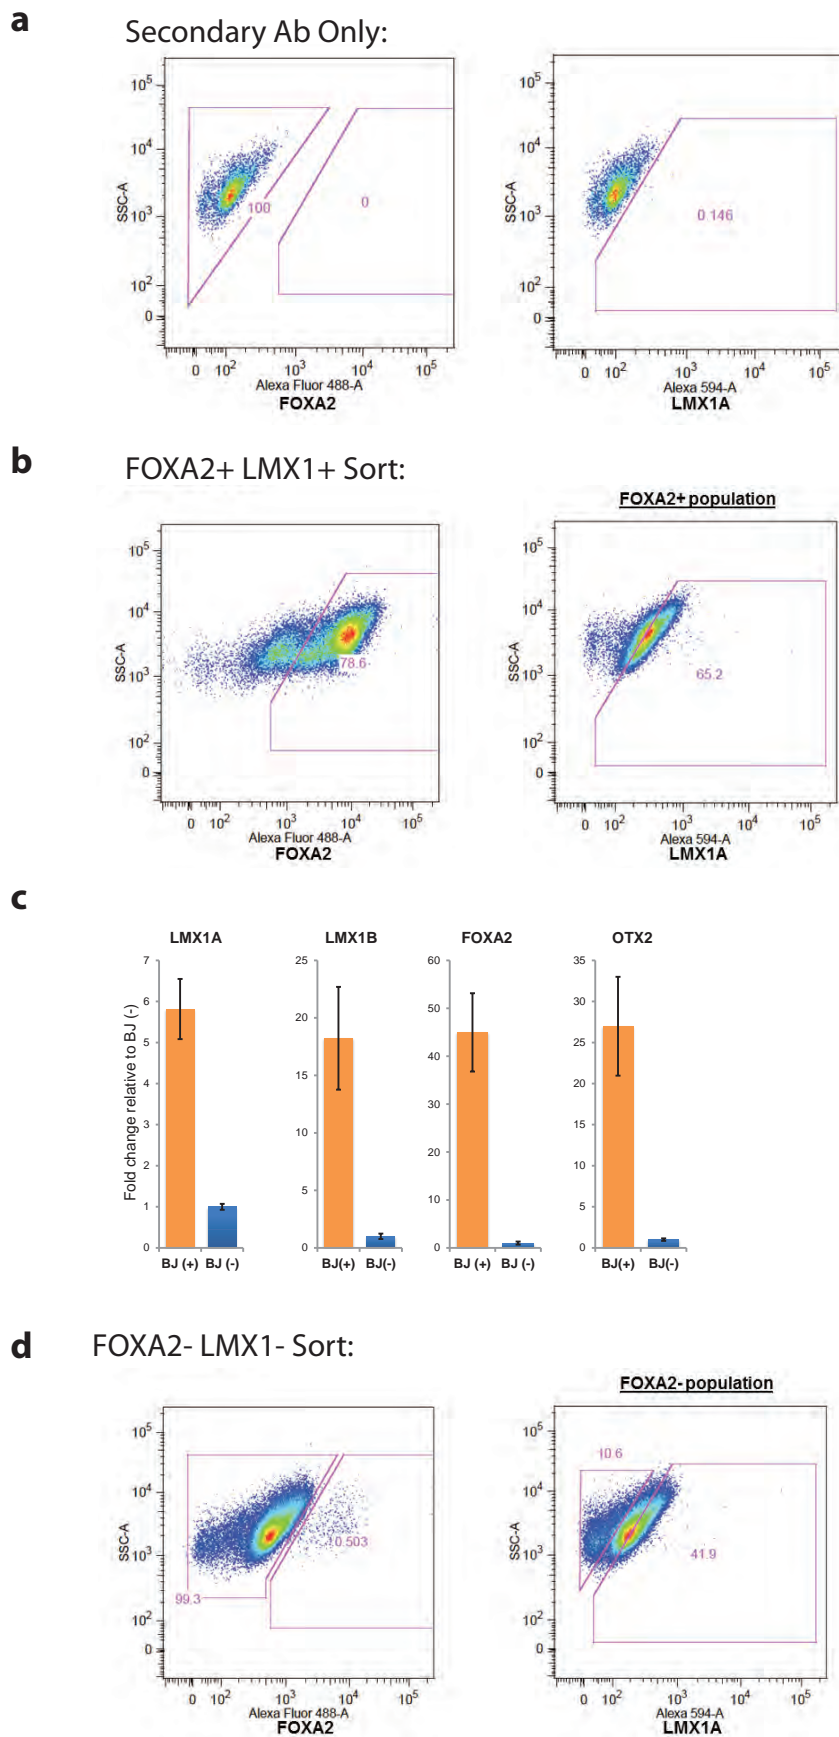

**Figure S3. Representative FACS plots for collecting the LMX1+FOXA2+ and LMX1-FOXA2- populations used for microarray analysis.**

a. Secondary only control plots used to set gates. b. Representative FACS plots for the LMX1A+FOXA2+ population. c. qPCR of the FOXA2+LMX1A+ sorted population (BJ+) compared to the FOXA2-LMX1A- population (BJ-) showing enrichment of dopaminergic progenitor markers LMX1A/B, FOXA2, and OTX2. Error bars represent standard error, qPCR normalized to GAPDH expression, n=3, performed in the BJriPS line. d. Representative FACS plots for the LMX1-FOXA2- population.

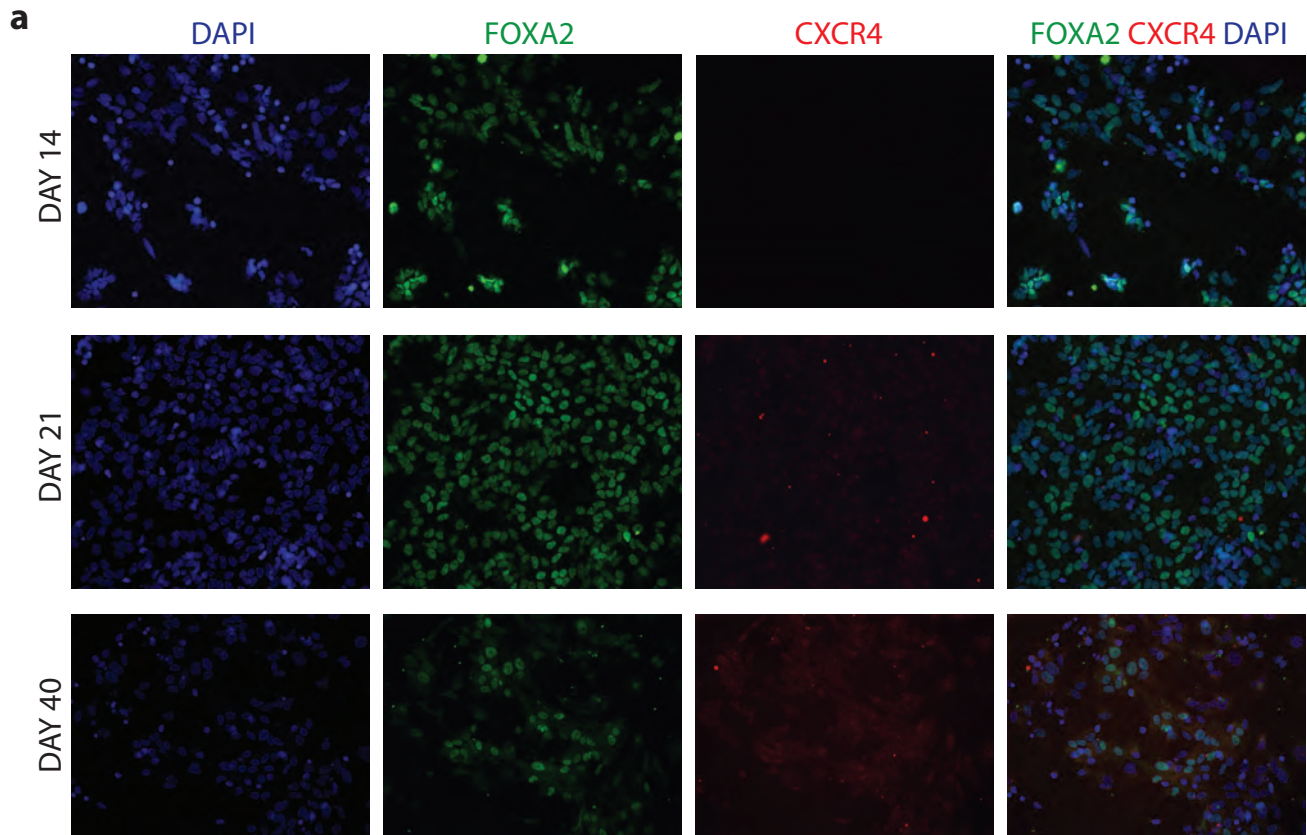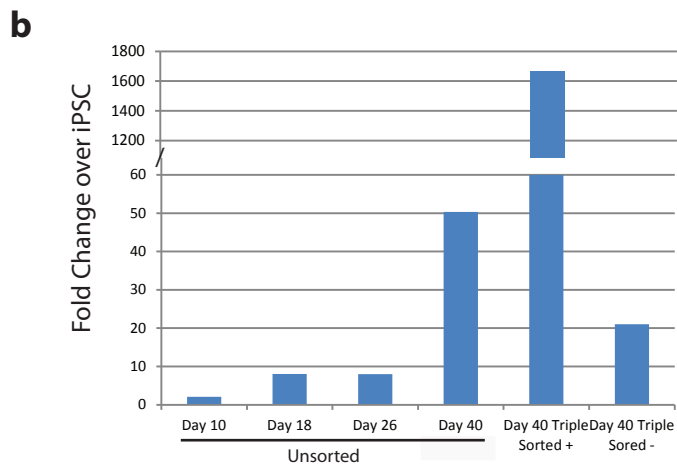

**Figure S4. CXCR4 expression is low in mDA NPCs and increases over time.**

a. Immunostaining of day 14, 21, and 40 BJ-RiPS differentiation. CXCR4 staining is absent in day 14 but increases to day 40. b. qPCR comparing a differentiation timeline of BJ-RiPS to the starting iPSC shows that CXCR4 expression increases over time. Additionally at day 40 the neurons derived from the CXCR4-CORIN+CD166+ NPCs, had a very high level of CXCR4 expression further illustrating their maturity and higher percentage of mDA neurons over



**a**

Secondary Only:

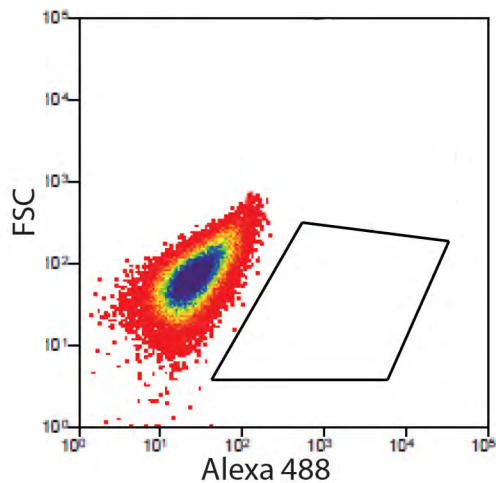

Corin +Secondary:

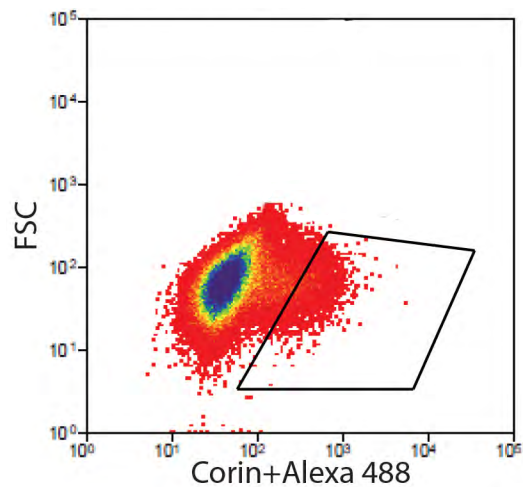**b**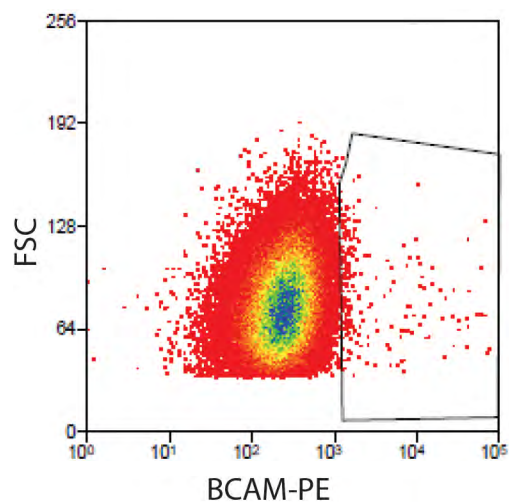**c**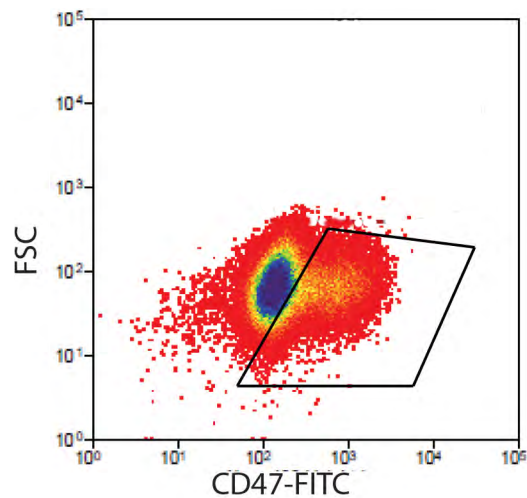**d**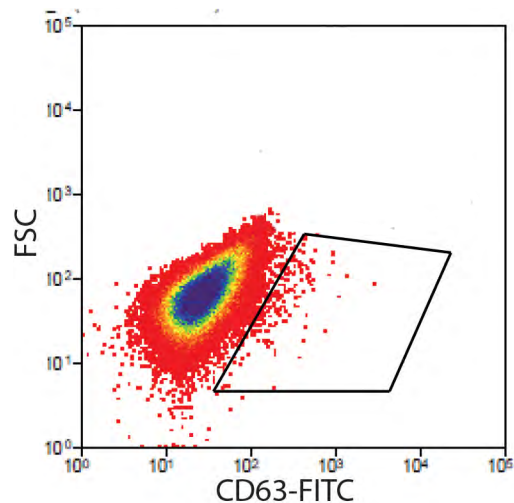**e**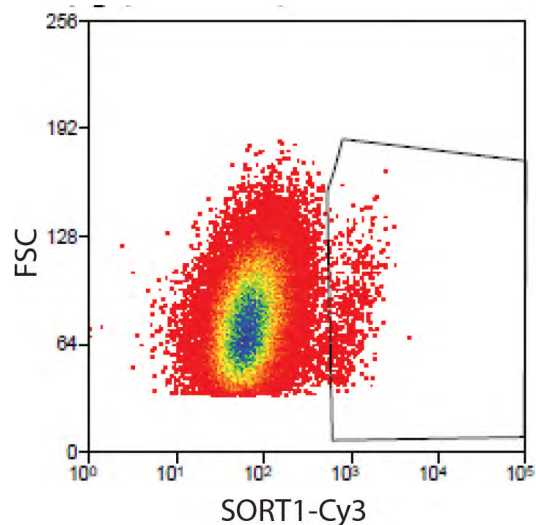

**Figure S5. Representative FACS plots of secondary only control and single surface markers that did not enrich for FOXA2+ NPCs.** a. Alexa 488 secondary only control (left) and with primary antibody Corin (right). b-e. FACS plots showing that the single surface markers BCAM, CD47, CD63, and SORT1 did yield labelled populations.
